# Supplementary material for: The endoplasmic reticulum, not the pH gradient, drives calcium refilling of lysosomes
Source: eLife. 2016 May 23;5:e15887. doi: 10.7554/eLife.15887 (PMC4909396; doi:10.7554/eLife.15887)
Supplement: Figure 1—source data 1. — DOI: http://dx.doi.org/10.7554/eLife.15887.003 [file elife-15887-fig1-data1.xlsx]

## Sheet: Sheet1
Figure Panel		Test used			S.D. or		n value					# of times			P value				Optional: if n < 5,
					S.E.M.							experiment was							in a separate source file
												replicated in
												laboratory
Figure 1B		One-way ANOVA			S.E.M.		n=26 coveslips					26 independent experiments			0.0043				N/A
Figure 1H		individual paired t-tests			S.E.M.		n=6 control & n=8 baf-A treated coverslips					6 independent experiments			1st-0.11, 2nd 0.01, 3rd 0.004				N/A
Figure 1J		individual paired t-tests			S.E.M.		n=3 control and con-A treated coverslips					3 independent experiments			1st-0.09, 2nd 0.33, 3rd 0.66				in Sheet 2

## Sheet: Sheet2
	Con A Experiment
		1st	2nd	3rd
1	Con A	1.75	1.73807	1.68474
	Control	1.20246	1.75477	1.99269
2	Con A	2.1038	1.90016	1.5436
	Control	1.62006	1.68705	1.63919
3	Con A	1.72149	2.65165	2.01225
	Control	2.61466	2.77124	2.79833
