# Supplementary material for: The endoplasmic reticulum, not the pH gradient, drives calcium refilling of lysosomes
Source: eLife. 2016 May 23;5:e15887. doi: 10.7554/eLife.15887 (PMC4909396; doi:10.7554/eLife.15887)
Supplement: Figure 2—source data 1. — Comparisons of responses to ML-SA1 (E) and GPN (G) (Figure 2—figure supplement 1E,G). DOI: http://dx.doi.org/10.7554/eLife.15887.009 [file elife-15887-fig2-data1.xlsx]

## Sheet: Sheet1
Figure Panel		Test used			S.D. or		n value					# of times			P value						Optional: if n < 5,
					S.E.M.							experiment was									in a separate source file
												replicated in
												laboratory
Figure 2E		paired t-test			S.E.M.		n=5 control and treated coverslips					5 independent experiments			0.036						N/A
Figure 2G		paired t-test			S.E.M.		n=5 control and treated coverslips					5 independent experiments			TG-0.008; TPEN 0.001						N/A
Figure 2I		paired t-test			S.E.M.		n=5 control and treated coverslips					25 independent experiments			Xesto-0.007; 2-APB 0.0127; U73122 0.007; Ry 0.829						N/A
Figure 2-figure supplement 1E		paired t-test			S.E.M.		n=8 coverslips					8 independent experiments			0.00051						N/A
Figure 2-figure supplement 1G		paired t-test			S.E.M.		n=10 coverslips					10 independent experiments			0.017						N/A
