# Supplementary material for: The endoplasmic reticulum, not the pH gradient, drives calcium refilling of lysosomes
Source: eLife. 2016 May 23;5:e15887. doi: 10.7554/eLife.15887 (PMC4909396; doi:10.7554/eLife.15887)
Supplement: Figure 3—source data 1. — The effects of Xesto on GPN responses in GCaMP3-ML1 (G) and MEF cells (J) (Figure 3—figure supplement 1G, J). ML-SA1 responses in GCaMP3-ML1-transfected WT and IP3R-TKO DT40 cells (Figure 3—figure supplement 2B). The effects of Xesto treatment on lysosomal Ca2+ changes induced by ML-SA1 (Figure 3—figure supplement 3E, G). DOI: http://dx.doi.org/10.7554/eLife.15887.013 [file elife-15887-fig3-data1.xlsx]

## Sheet: Sheet1
Figure Panel		Test used			S.D. or		n value					# of times			P value							Optional: if n < 5,
					S.E.M.							experiment was										in a separate source file
												replicated in
Figure 3C		paired t-test			S.E.M.		n=5 control and treated coverslips					25 independent experiments			Xesto-0.007; 2-APB 0.0127; U73122 0.007; Ry 0.829								N/A
Figure 3F		paired t-test			S.E.M.		n=5 control and treated coverslips					5 independent experiments			WT-0.0278; TKO 0.9946								N/A
Figure 3H		t-test			S.E.M.		n=9 in control and ML-SA1; n= 7 in recovery experiments					9 independent experiments			ML-SA1-9.69E-07; recovery 0.45; recovery+TG 0.016; recovery+Xesto 0.0001								N/A
Figure 3-figure supplement 1G		paired t-test			S.E.M.		n=5 coverslips					3 independent experiments			0.076								N/A
Figure 3-figure supplement 1J		paired t-test			S.E.M.		n=5 coverslips					5 independent experiments			0.098								N/A
Figure 3-figure supplement 2B		paired t-test			S.E.M.		n=5 coverslips					5 independent experiments			0.1991								N/A
Figure 3-figure supplement 3E		paired t-test			S.E.M.		n=5 coverslips					3 independent experiments			0.026								N/A
Figure 3-figure supplement 3G		t-test			S.E.M.		n=6 in control and with ML-SA1; n=5 in recovery					5 independent experiments			ML-SA1 0.008;recovery 0.46; recovery+TG 0.0038								N/A
