# Supplementary material for: The endoplasmic reticulum, not the pH gradient, drives calcium refilling of lysosomes
Source: eLife. 2016 May 23;5:e15887. doi: 10.7554/eLife.15887 (PMC4909396; doi:10.7554/eLife.15887)
Supplement: Figure 4—source data 1. — DOI: http://dx.doi.org/10.7554/eLife.15887.018 [file elife-15887-fig4-data1.xlsx]

## Sheet: Sheet1
Figure Panel		Test used			S.D. or		n value					# of times			P value							Optional: if n < 5,
					S.E.M.							experiment was										in a separate source file
												replicated in
Figure 4A		t-test			S.E.M.		n=6 2-APB; n=4 TPEN; n=5 DHBP; n=4 Xesto					6 independent experiments			2-APB-0.0507; TPEN 0.0171; DHBP 0.02324; Xesto 0.0115							in Sheet 2
Figure 4B		paired t-test			S.E.M.		n=5 control and treated coverslips					5 independent experiments			Xesto- 0.0024; DHBP 0.7486							in Sheet 2

## Sheet: Sheet2
Western			Western			Western				Western				LysoTracker
DMSO	2-APB		DMSO	DHBP		DMSO	TPEN			DMSO	Xesto			DMSO	Xesto	DHBP
1.52297	1.99264		1.89091	1.45523		1.34151	2.28314			0.435865	0.899259			583.889	2663.83	870.636
1.62302	3.32421		1.20012	0.805009		0.630168	1.35478			0.430939	1.1987			70.1108	1501.15	137.283
0.612417	0.853778		2.02685	1.79071		1.96708	2.52221			2.21785	3.33708			175.746	1591.56	256.748
0.663175	0.892428		2.61822	1.13914		1.24137	1.55892			0.485195	1.16408			387.013	2099.92	227.544
0.612417	0.853778		1.01384	1.42402										891.734	1652.78	384.123
1.21318	1.91322
