# Supplementary figures and images for: The endoplasmic reticulum, not the pH gradient, drives calcium refilling of lysosomes
Source: eLife journal article supplement (doi:10.7554/elife.15887), 2016-05-23

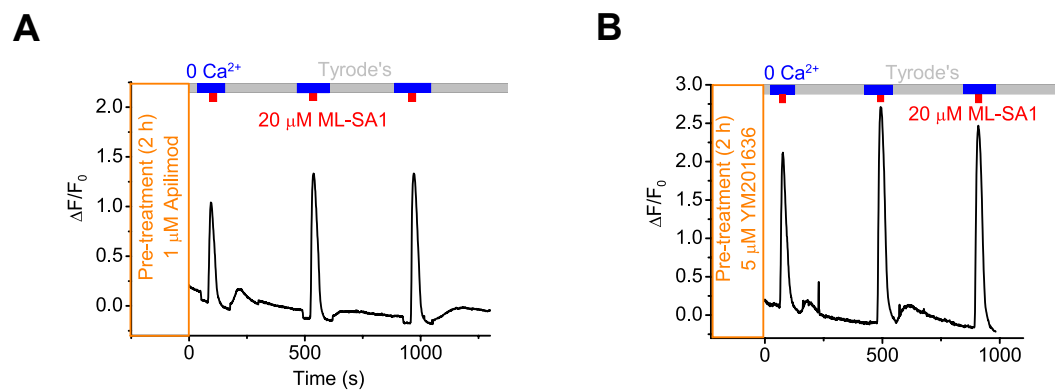

Garrity et al Figure 1-figure supplement 4

Supplement: supp [file elife-15887-supp-v1.zip]

**A**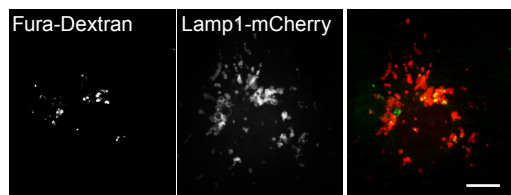**B**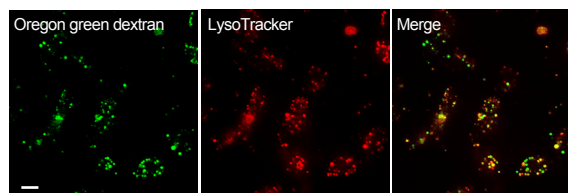**C**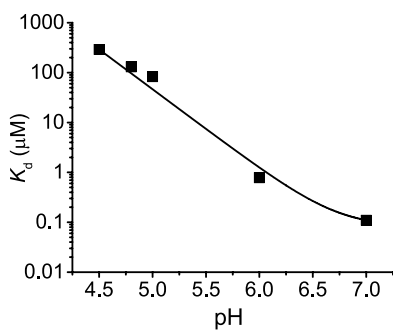**D**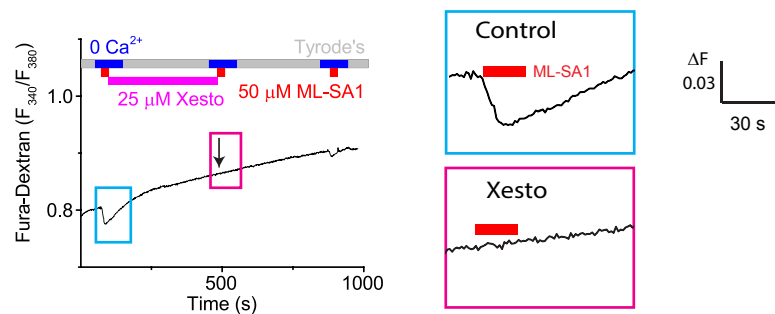**E**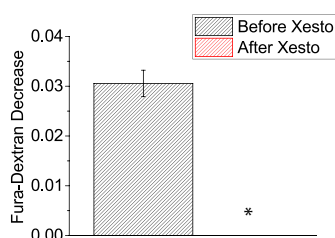**F**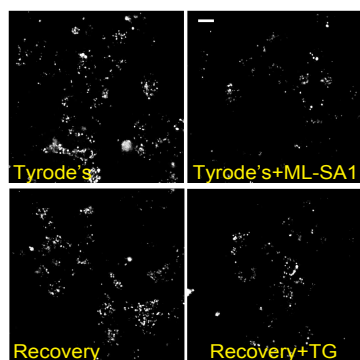**G**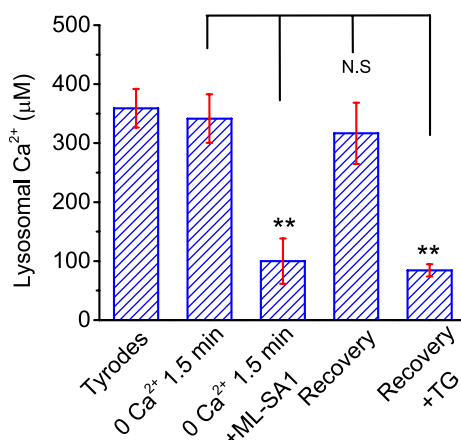**H**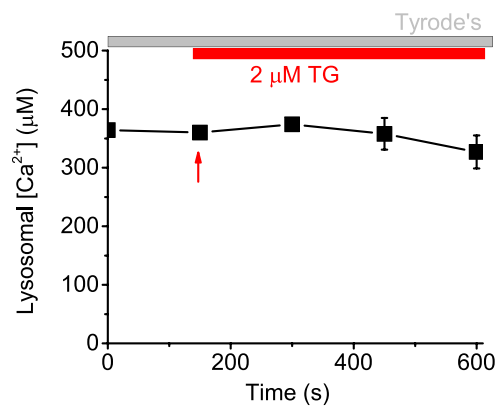**I**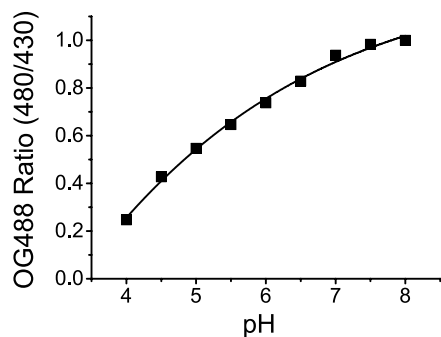**J**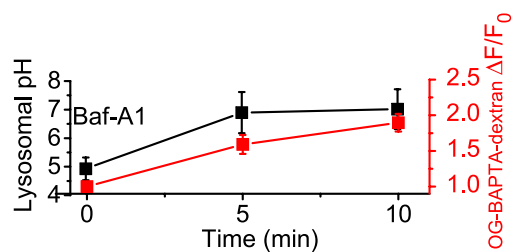**K**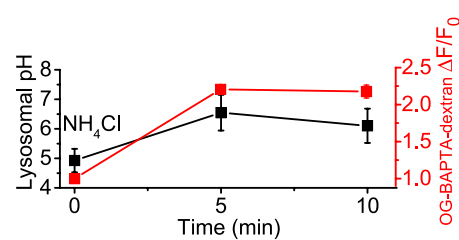

Supplement: supp [file elife-15887-supp-v1.zip]

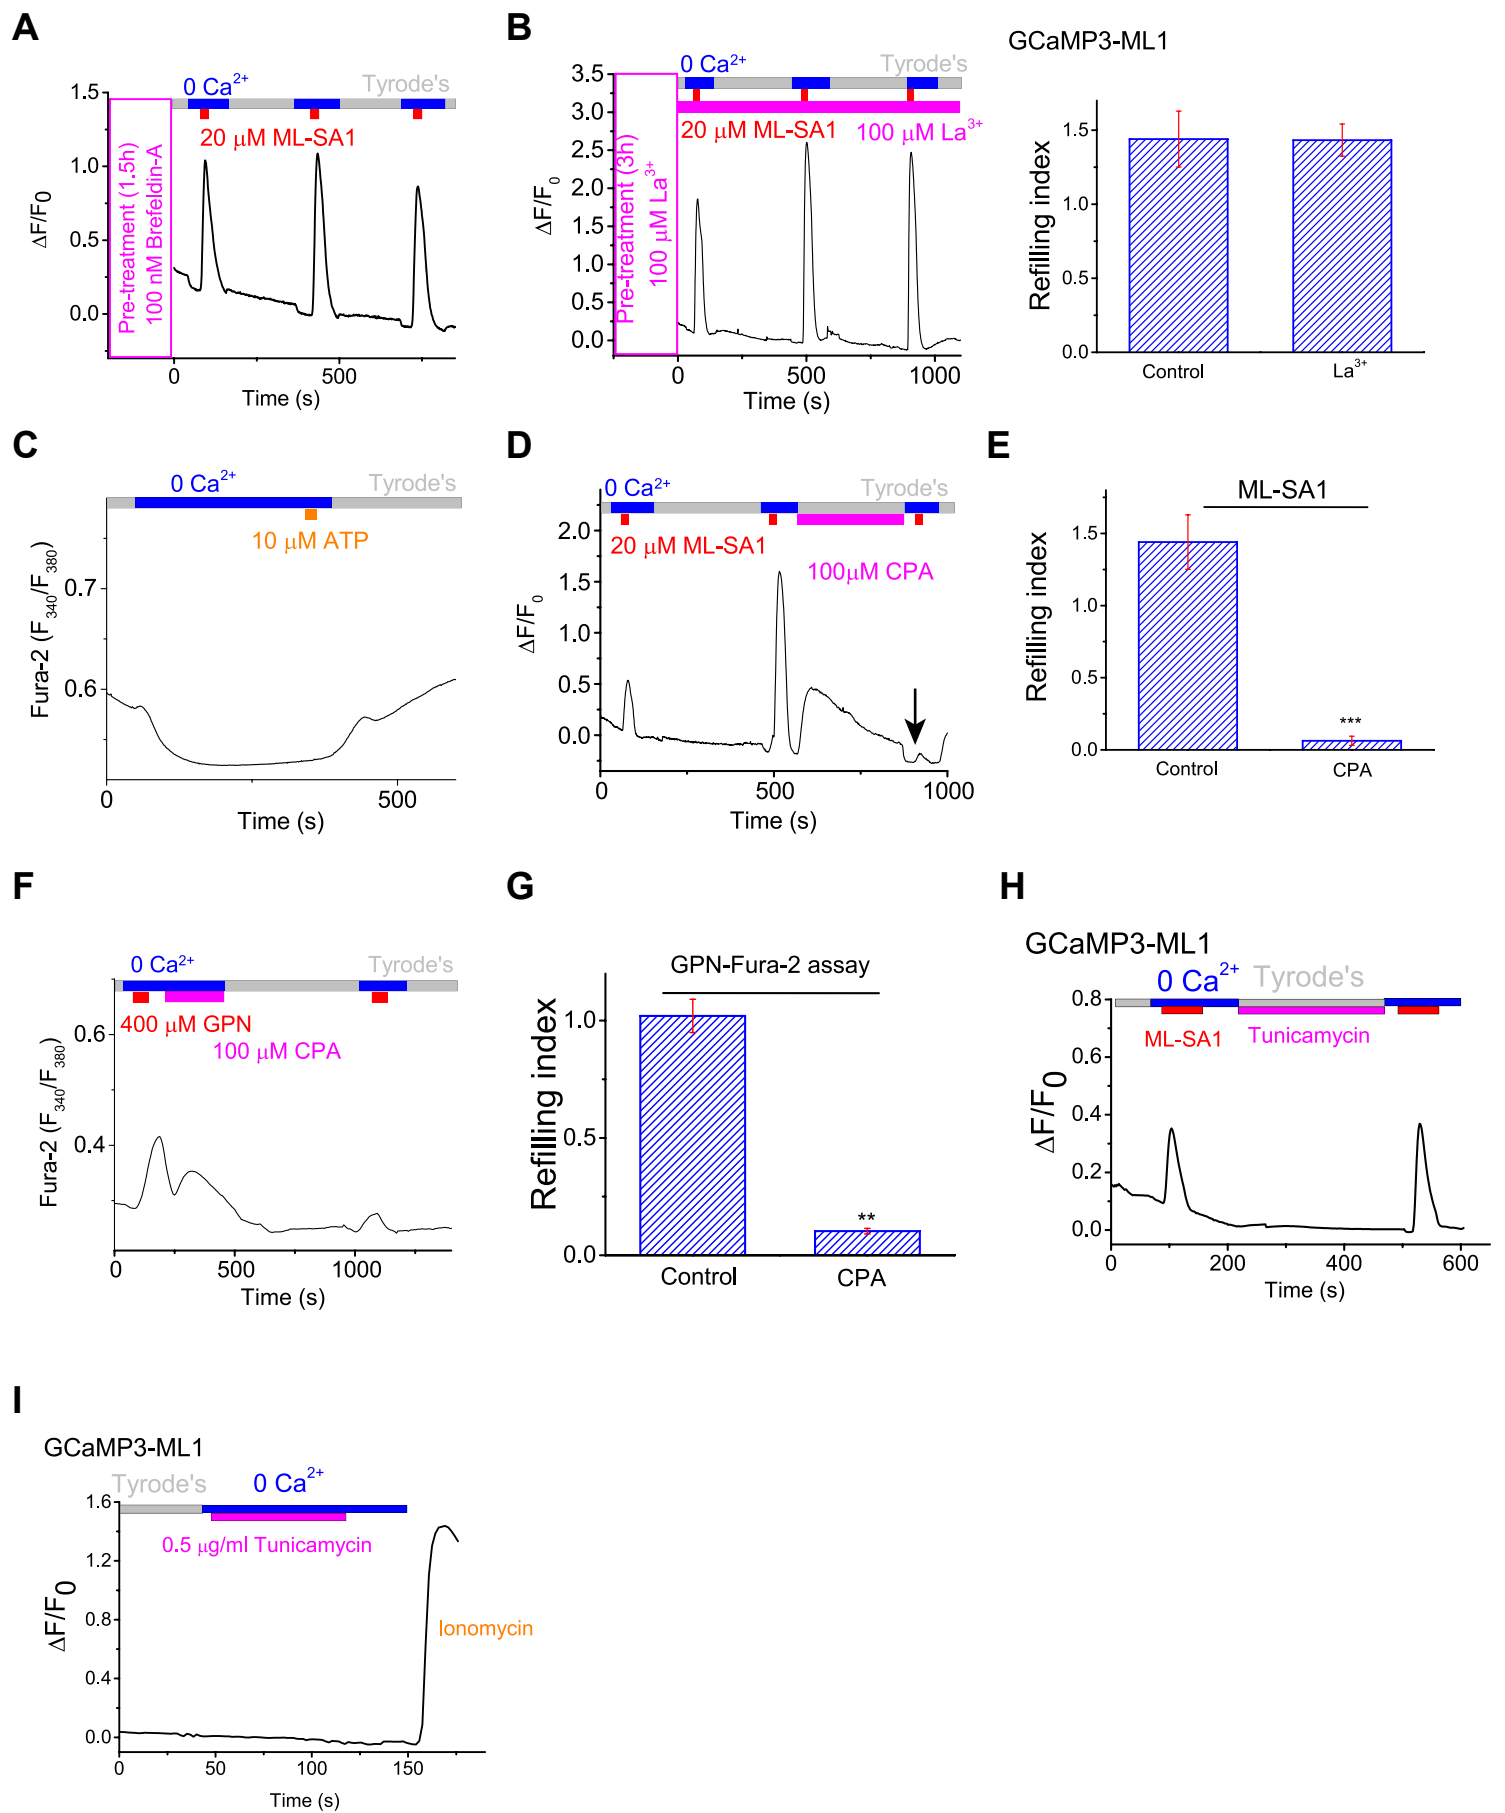

Supplement: supp [file elife-15887-supp-v1.zip]

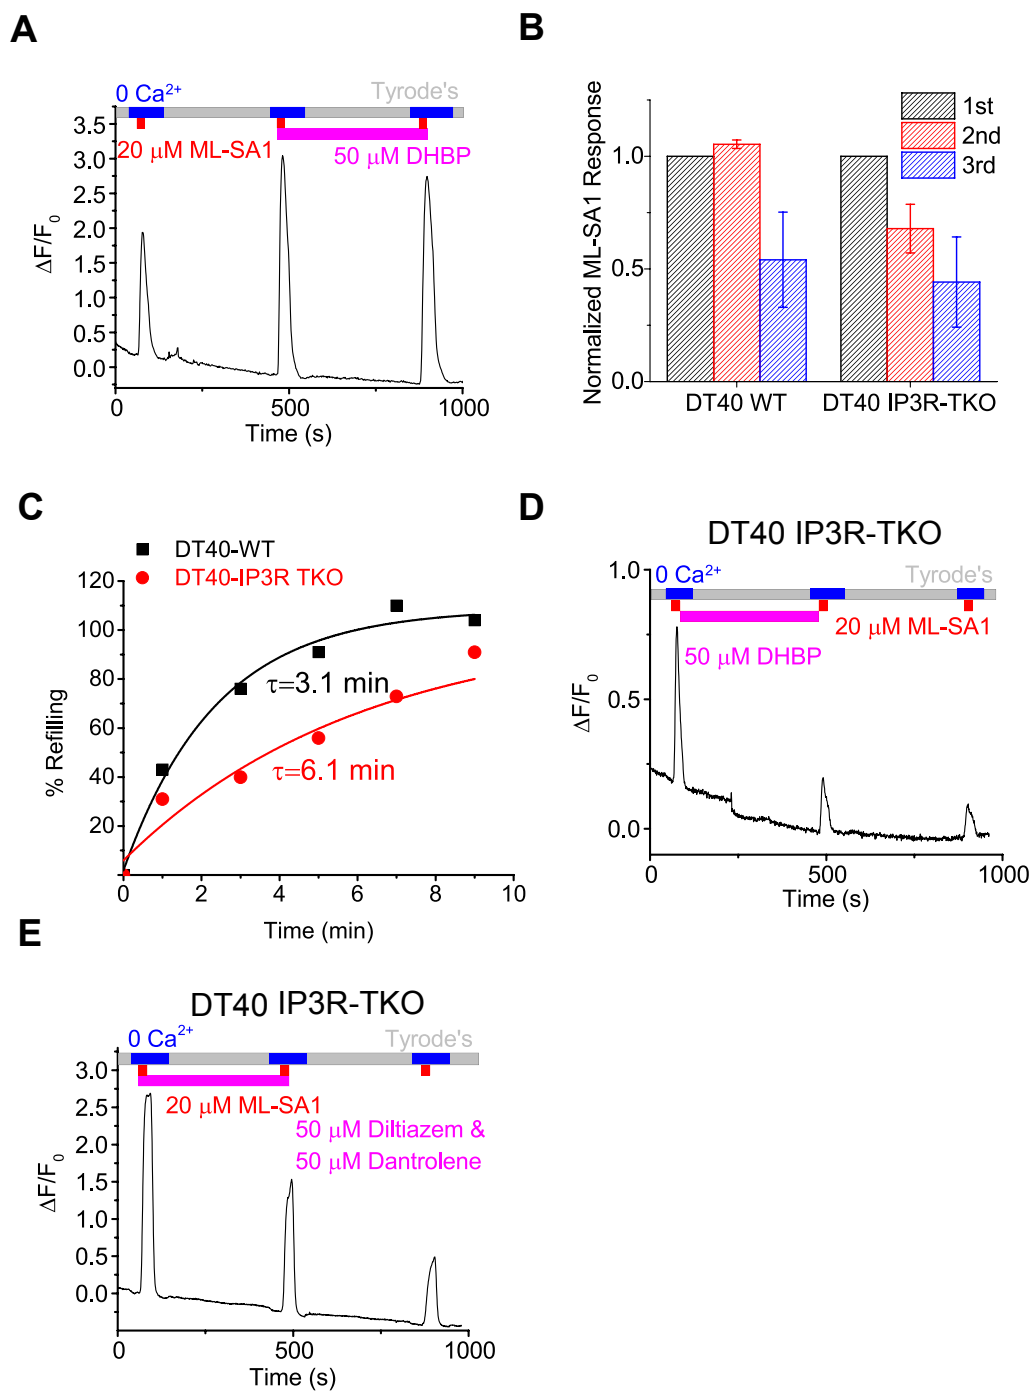

Supplement: supp [file elife-15887-supp-v1.zip]

**A**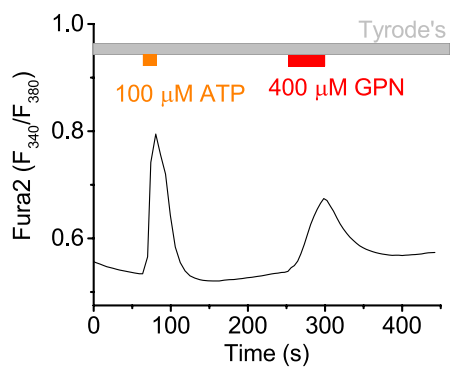**B**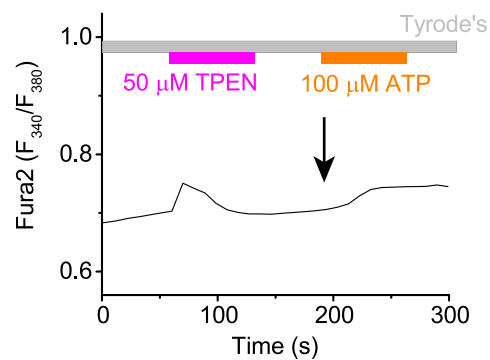**C**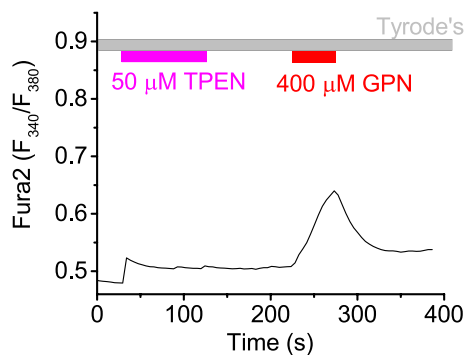**D**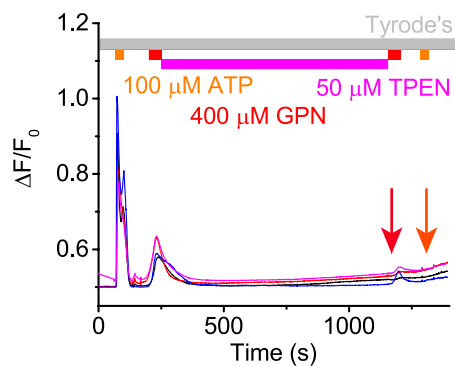**E**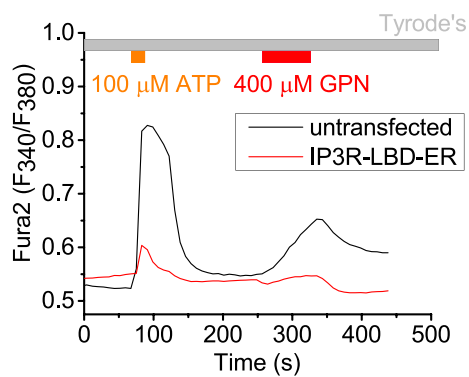**F**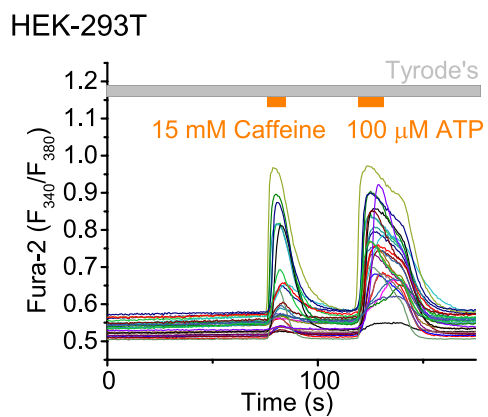

Supplement: supp [file elife-15887-supp-v1.zip]

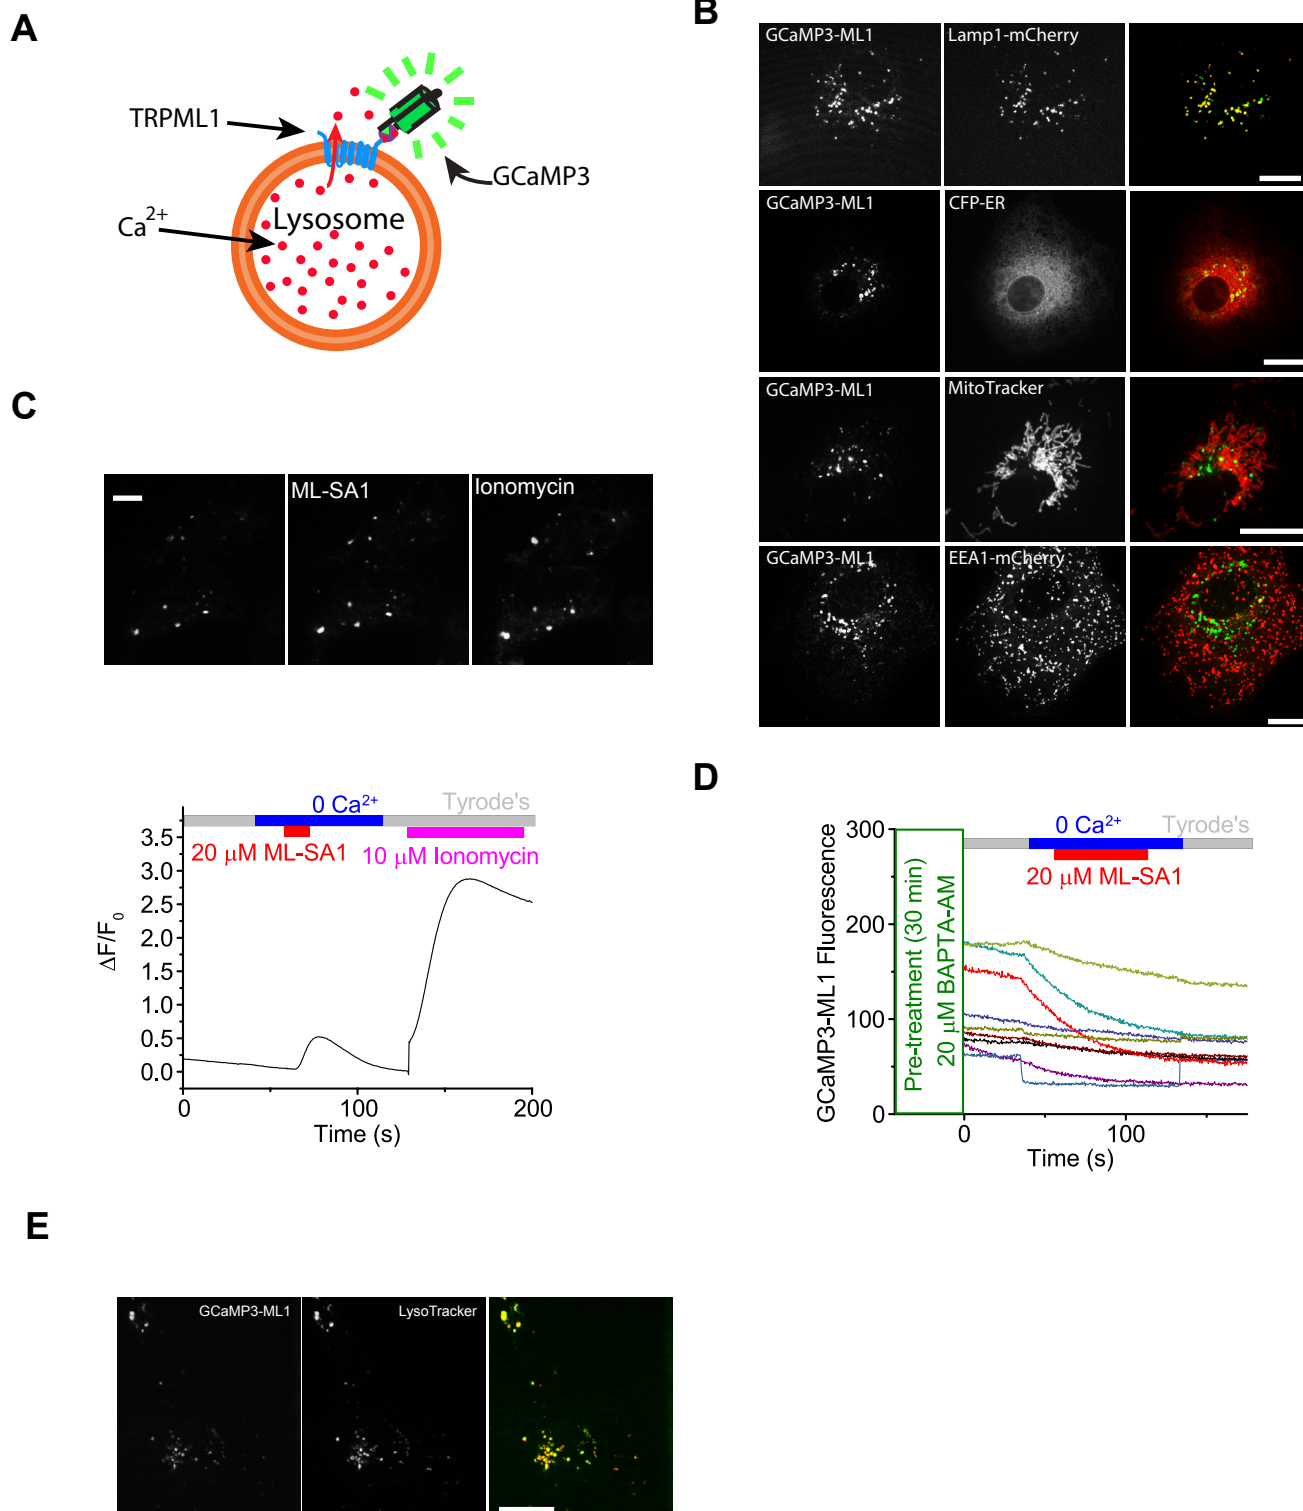

Supplement: supp [file elife-15887-supp-v1.zip]

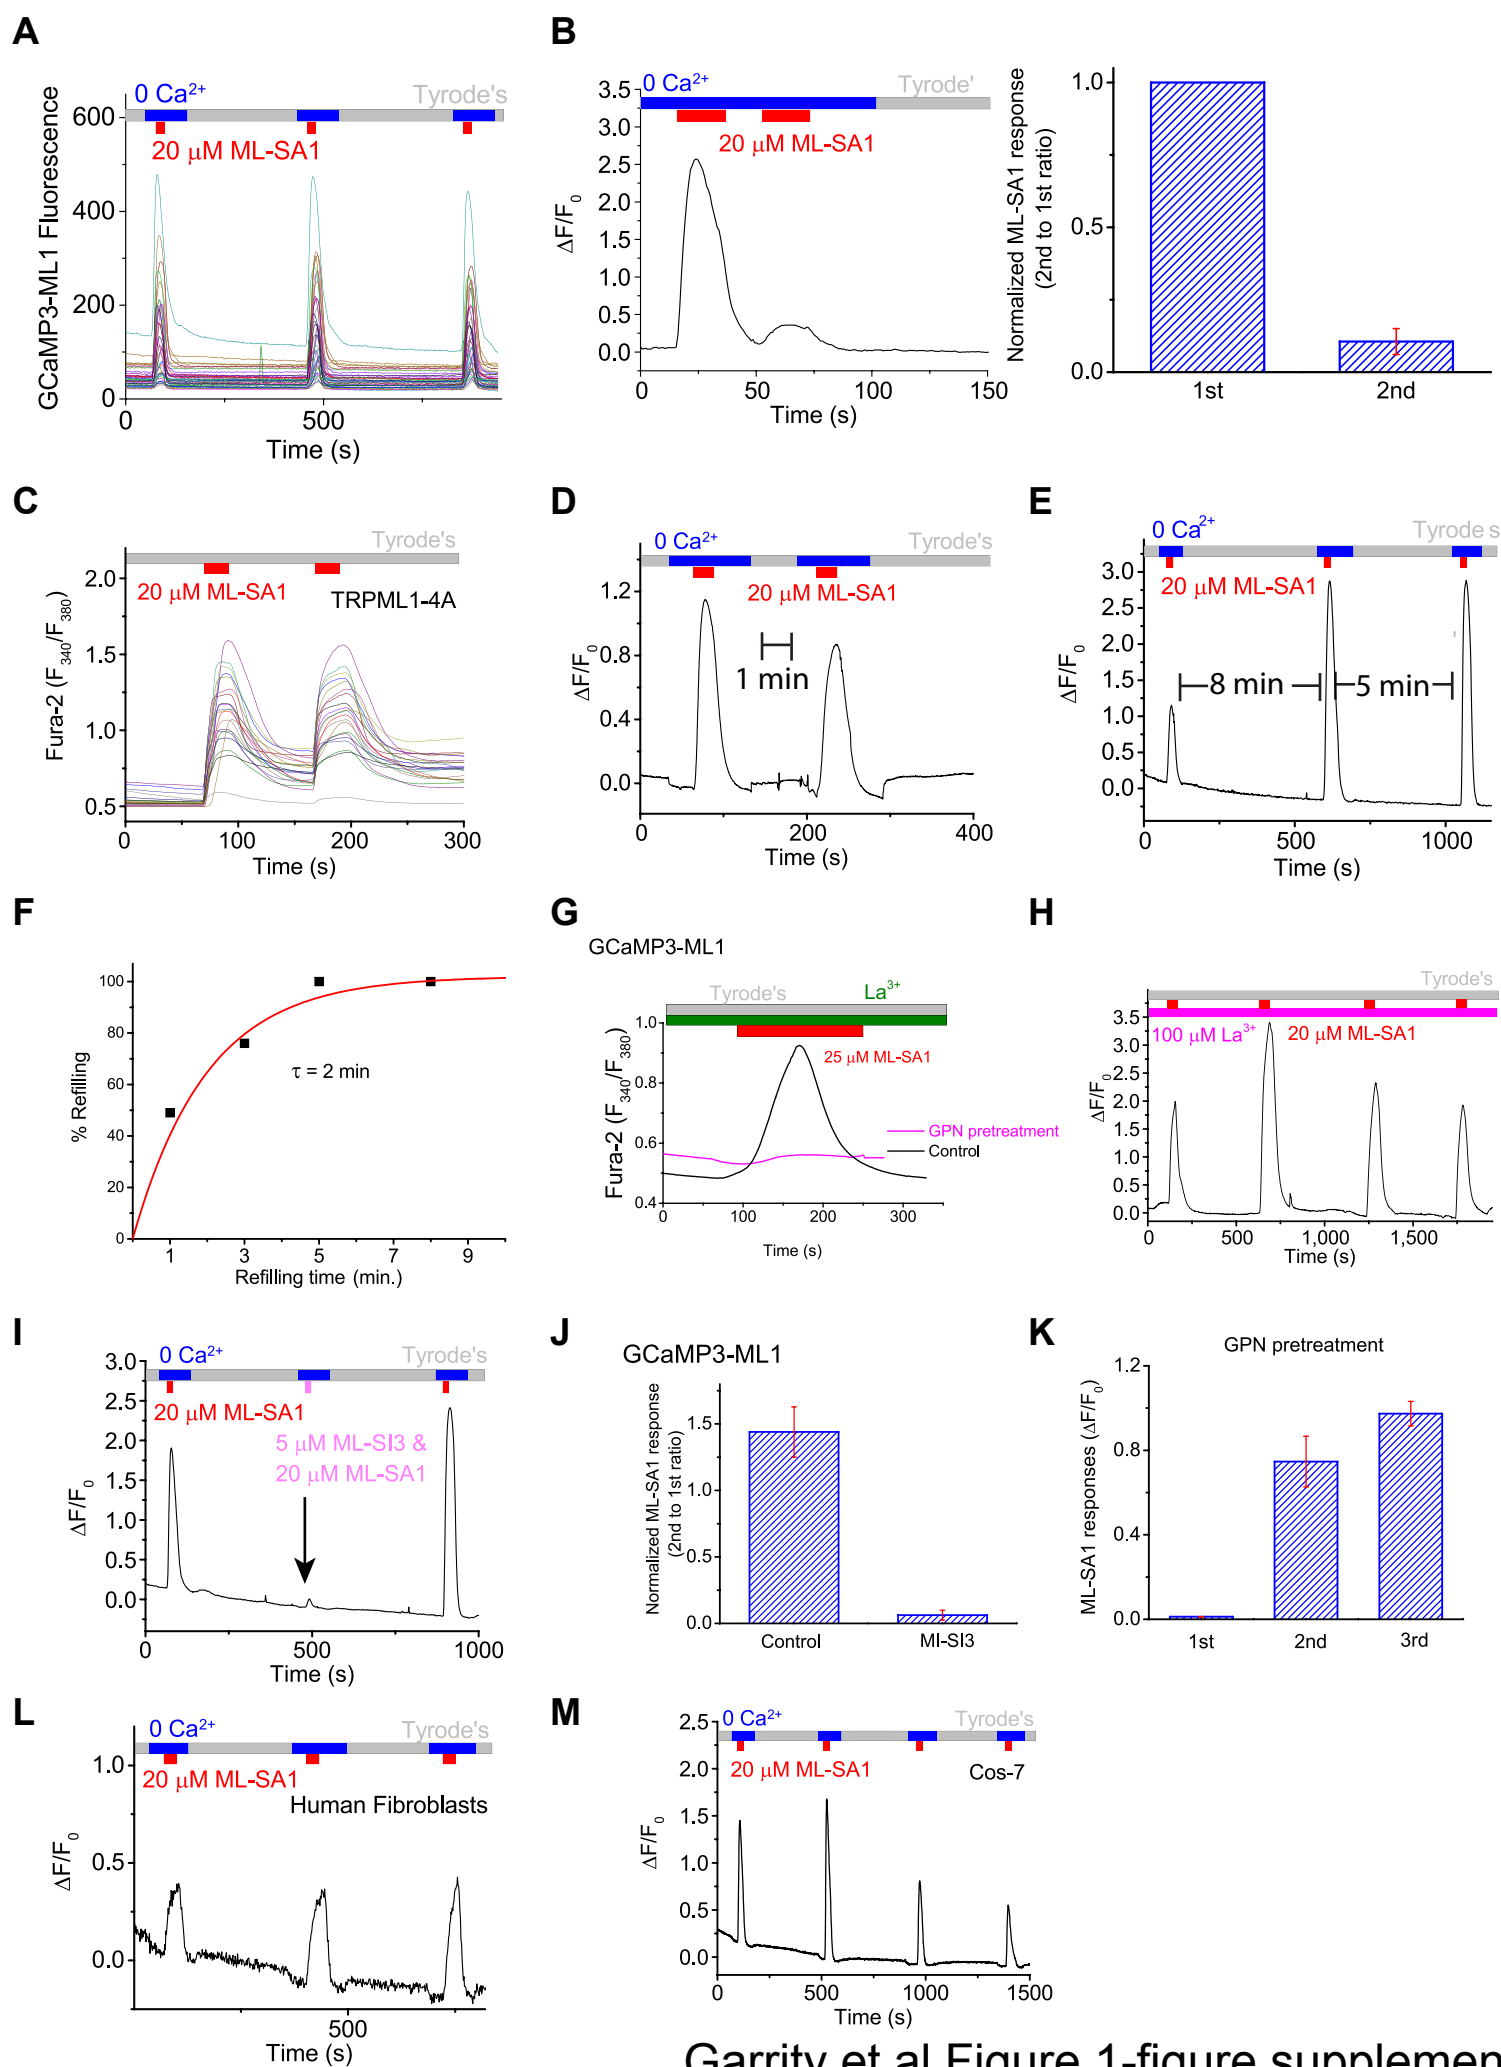

Supplement: supp [file elife-15887-supp-v1.zip]

**A**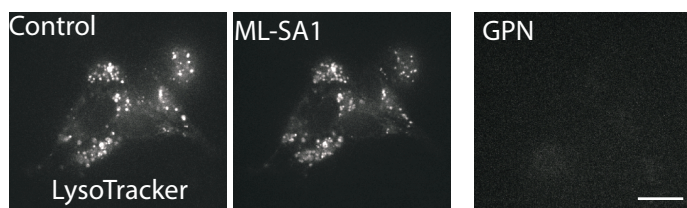**B**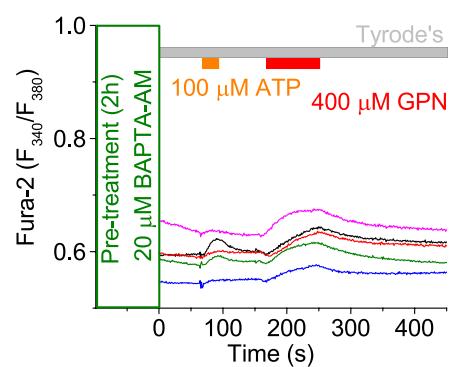**C**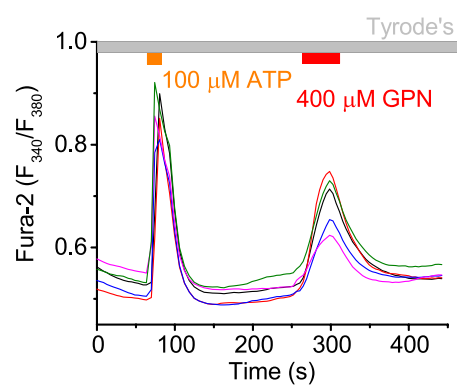**D**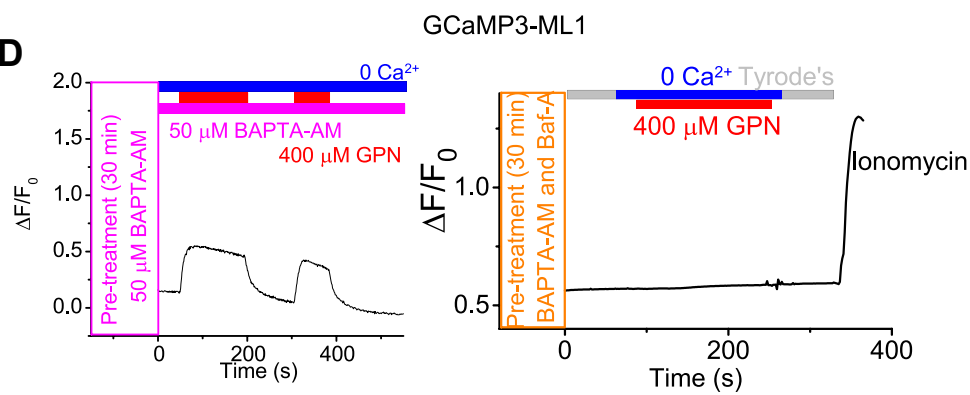**E**

GCaMP3-ML1

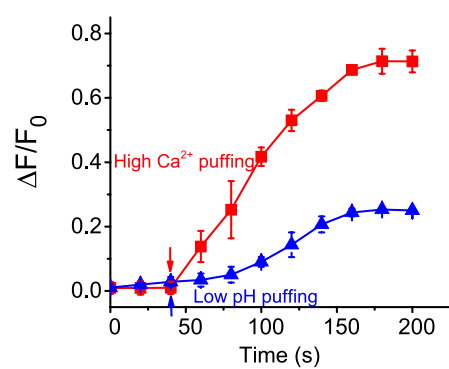

Garrity et al Figure 1-figure supplement 3

Supplement: supp [file elife-15887-supp-v1.zip]

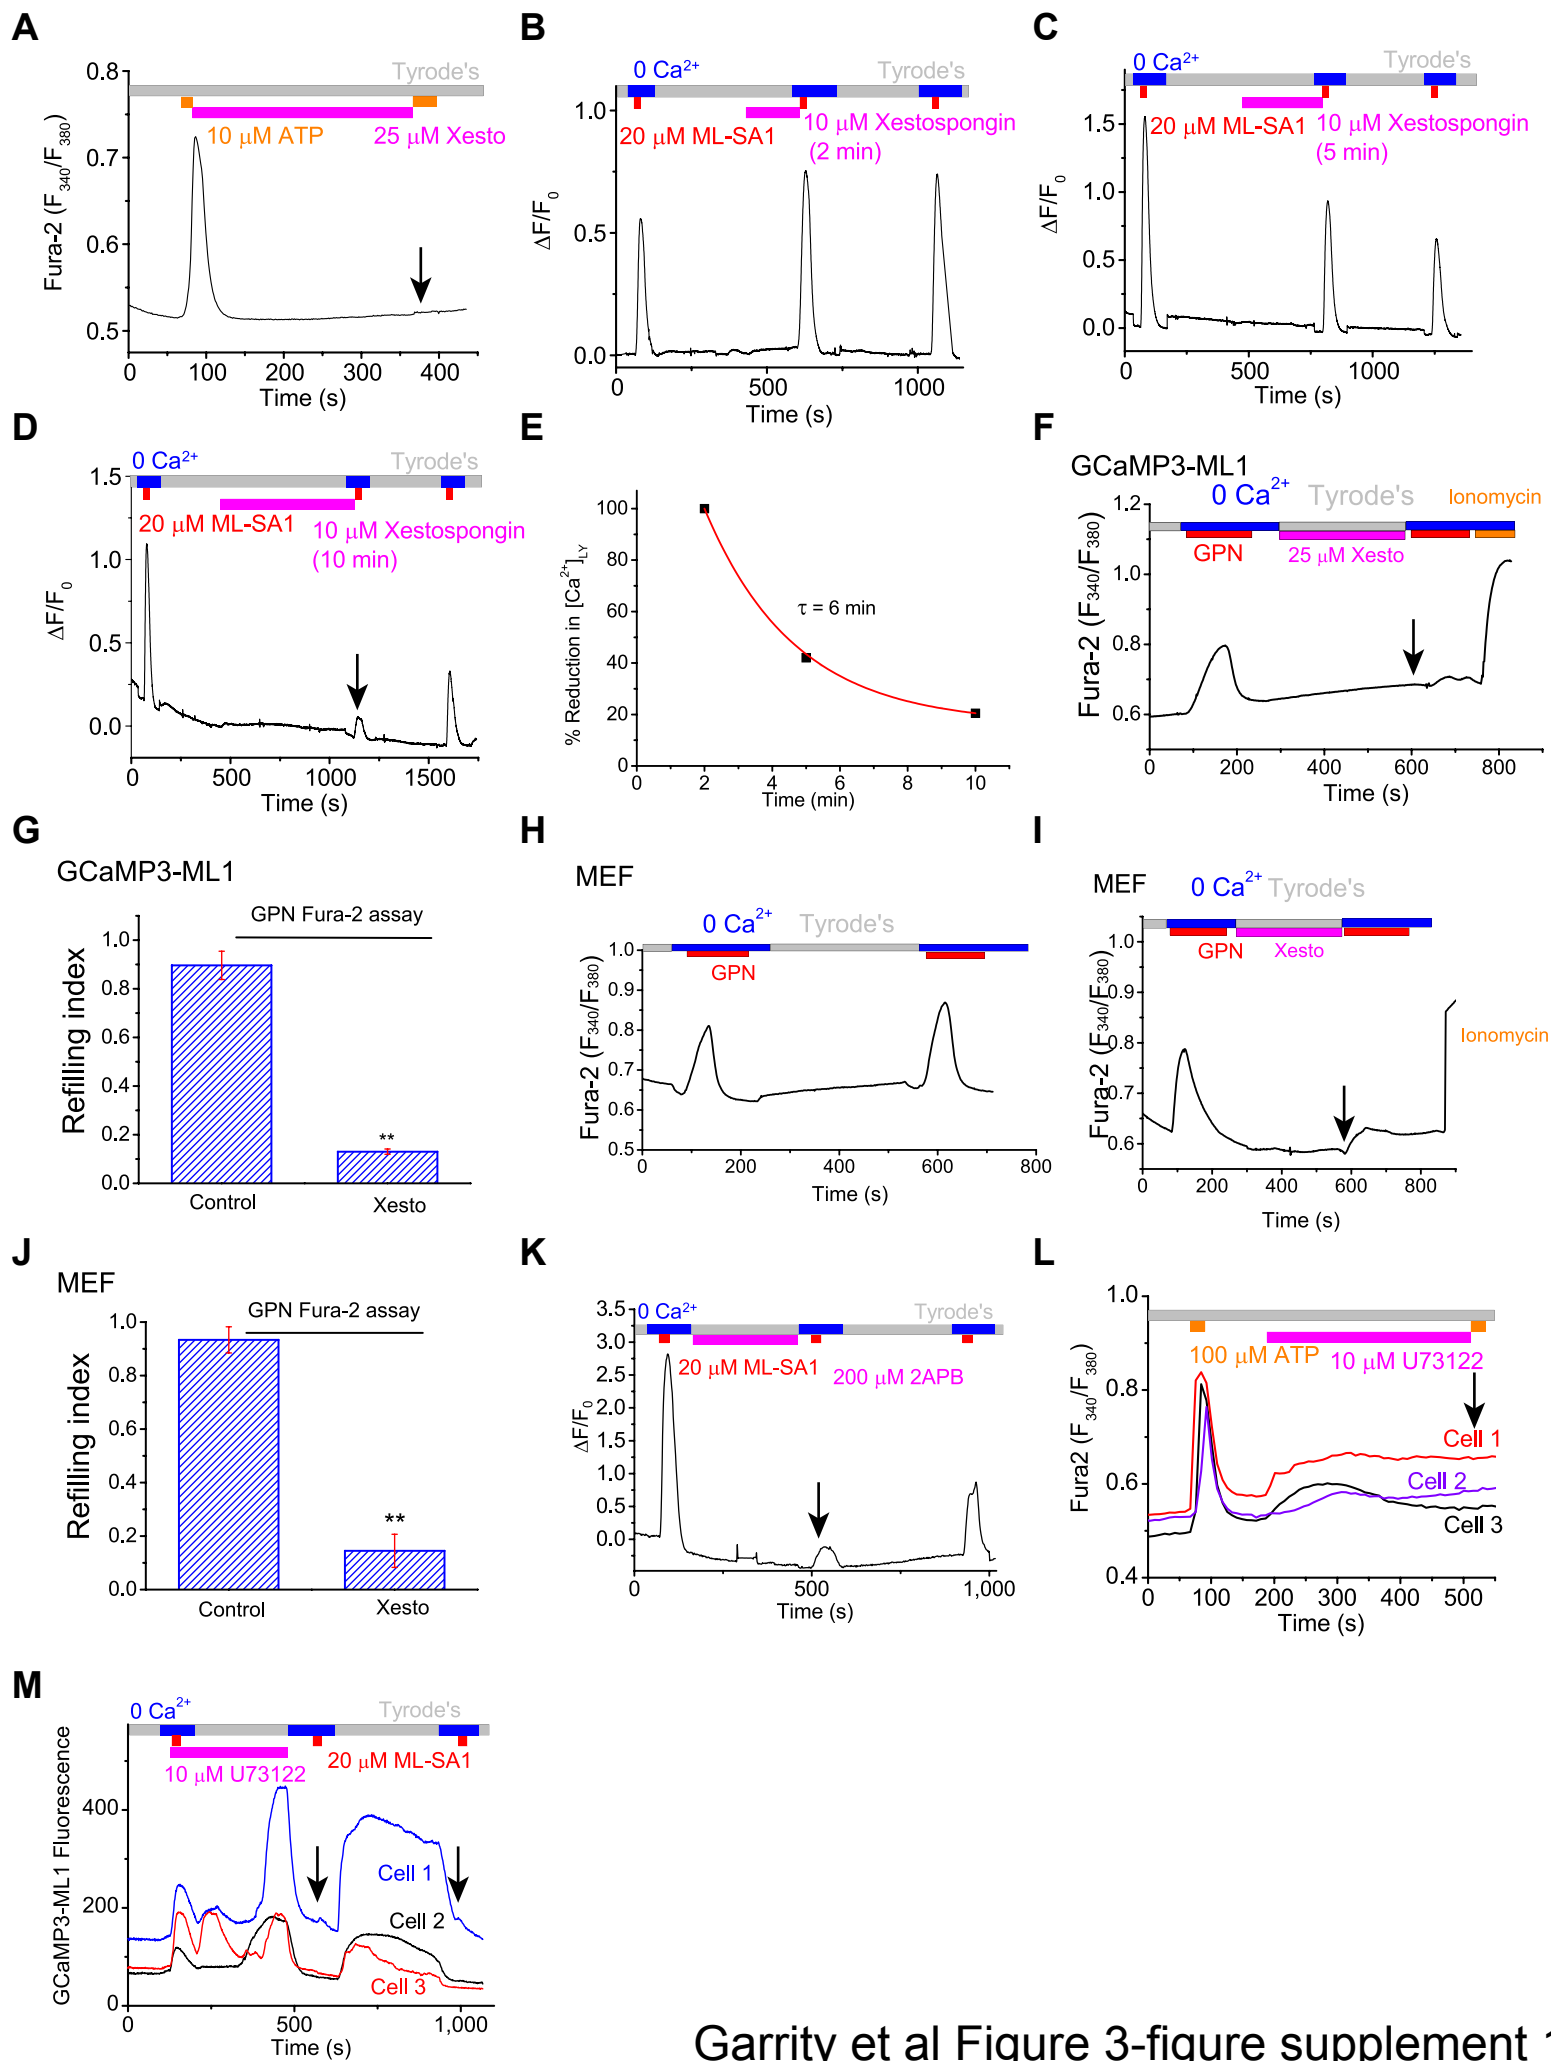

Supplement: supp [file elife-15887-supp-v1.zip]
